# Supplementary material
Source: Research Square preprint supplement (doi:10.21203/rs.3.rs-9892520/v1)
Supplement: Supplementary file 1 [file 76c3cdaee61547261d259796.docx]

Supplementary Table 1 | Subgroup analyses of ASR-induced biomarker distortion (Experiment 3). For each subgroup, the dementia-control group difference is reported for both the human transcript (Human effect) and ASR transcript (ASR effect). Deviation = (ASR group effect) - (Human group effect). 95% CIs and p-values are from independent-samples t-tests on per-recording transcription-induced deltas (ASR - Human) between dementia and control groups. FDR correction (Benjamini-Hochberg) applied within each subgroup across all tests (4 biomarkers x 8 ASR systems). Bold rows indicate FDR-corrected p < 0.05. Age >=75 subgroup has limited statistical power (n = 10 control recordings); results should be interpreted with caution. Q1-Q4 = transcript length quartiles based on ground-truth word count (Q1: <=57; Q2: 58-79; Q3: 80-123; Q4: >123 words).

***Monologue***

| **Type-token ratio** | **n (Dem / Con)** | **Human effect** | **ASR effect** | **Deviation (ASR - Human)** | **95% CI** | **p-value** | **p-FDR** |
| --- | --- | --- | --- | --- | --- | --- | --- |
| **Human (reference)** | **156 / 55** | **-0.0655** | **-** | **-** | **-** | **-** | **-** |
| **AWS** | **156 / 55** | **-0.0655** | **-0.0442** | **+0.0213** | **(+0.0093 to +0.0332)** | **<0.001** | **0.003** |
| **AssemblyAI** | **156 / 55** | **-0.0655** | **-0.0384** | **+0.0271** | **(+0.0142 to +0.0401)** | **<0.001** | **<0.001** |
| CrisperWhisper | 156 / 55 | -0.0655 | -0.0799 | -0.0144 | (-0.0315 to +0.0027) | 0.099 | 0.198 |
| Google | 156 / 55 | -0.0655 | -0.0619 | +0.0036 | (-0.0129 to +0.0201) | 0.669 | 0.722 |
| **Meta** | **156 / 55** | **-0.0655** | **0.0088** | **+0.0743** | **(+0.0524 to +0.0962)** | **<0.001** | **<0.001** |
| Microsoft | 156 / 55 | -0.0655 | -0.0650 | +0.0005 | (-0.0277 to +0.0287) | 0.971 | 0.971 |
| **Nemo** | **156 / 55** | **-0.0655** | **-0.0476** | **+0.0179** | **(+0.0045 to +0.0314)** | **0.009** | **0.025** |
| **Whisper** | **156 / 55** | **-0.0655** | **-0.0396** | **+0.0260** | **(+0.0118 to +0.0401)** | **<0.001** | **0.003** |

| **Pronoun ratio** | **n (Dem / Con)** | **Human effect** | **ASR effect** | **Deviation (ASR - Human)** | **95% CI** | **p-value** | **p-FDR** |
| --- | --- | --- | --- | --- | --- | --- | --- |
| **Human (reference)** | **156 / 55** | **0.0078** | **-** | **-** | **-** | **-** | **-** |
| AWS | 156 / 55 | 0.0078 | 0.0146 | +0.0069 | (+0.0003 to +0.0134) | 0.039 | 0.089 |
| AssemblyAI | 156 / 55 | 0.0078 | 0.0041 | -0.0036 | (-0.0089 to +0.0017) | 0.177 | 0.292 |
| CrisperWhisper | 156 / 55 | 0.0078 | 0.0063 | -0.0015 | (-0.0074 to +0.0044) | 0.619 | 0.722 |
| Google | 156 / 55 | 0.0078 | 0.0097 | +0.0019 | (-0.0072 to +0.0111) | 0.677 | 0.722 |
| **Meta** | **156 / 55** | **0.0078** | **-0.0045** | **-0.0123** | **(-0.0198 to -0.0048)** | **0.001** | **0.006** |
| Microsoft | 156 / 55 | 0.0078 | 0.0084 | +0.0006 | (-0.0086 to +0.0098) | 0.898 | 0.927 |
| Nemo | 156 / 55 | 0.0078 | 0.0092 | +0.0014 | (-0.0036 to +0.0064) | 0.578 | 0.712 |
| Whisper | 156 / 55 | 0.0078 | 0.0119 | +0.0041 | (-0.0030 to +0.0112) | 0.258 | 0.393 |

| **Content-word ratio** | **n (Dem / Con)** | **Human effect** | **ASR effect** | **Deviation (ASR - Human)** | **95% CI** | **p-value** | **p-FDR** |
| --- | --- | --- | --- | --- | --- | --- | --- |
| **Human (reference)** | **156 / 55** | **0.0313** | **-** | **-** | **-** | **-** | **-** |
| **AWS** | **156 / 55** | **0.0313** | **0.0207** | **-0.0106** | **(-0.0170 to -0.0042)** | **0.001** | **0.006** |
| AssemblyAI | 156 / 55 | 0.0313 | 0.0264 | -0.0049 | (-0.0116 to +0.0017) | 0.145 | 0.273 |
| CrisperWhisper | 156 / 55 | 0.0313 | 0.0279 | -0.0034 | (-0.0111 to +0.0043) | 0.387 | 0.519 |
| **Google** | **156 / 55** | **0.0313** | **0.0211** | **-0.0102** | **(-0.0187 to -0.0017)** | **0.019** | **0.048** |
| Meta | 156 / 55 | 0.0313 | 0.0244 | -0.0069 | (-0.0168 to +0.0030) | 0.169 | 0.292 |
| **Microsoft** | **156 / 55** | **0.0313** | **0.0107** | **-0.0206** | **(-0.0358 to -0.0054)** | **0.008** | **0.023** |
| **Nemo** | **156 / 55** | **0.0313** | **0.0211** | **-0.0102** | **(-0.0176 to -0.0028)** | **0.007** | **0.022** |
| **Whisper** | **156 / 55** | **0.0313** | **0.0193** | **-0.0120** | **(-0.0200 to -0.0040)** | **0.004** | **0.012** |

| **Mean word length** | **n (Dem / Con)** | **Human effect** | **ASR effect** | **Deviation (ASR - Human)** | **95% CI** | **p-value** | **p-FDR** |
| --- | --- | --- | --- | --- | --- | --- | --- |
| **Human (reference)** | **156 / 55** | **-0.2392** | **-** | **-** | **-** | **-** | **-** |
| AWS | 156 / 55 | -0.2392 | -0.2545 | -0.0153 | (-0.0536 to +0.0230) | 0.431 | 0.551 |
| **AssemblyAI** | **156 / 55** | **-0.2392** | **-0.1512** | **+0.0880** | **(+0.0435 to +0.1324)** | **<0.001** | **<0.001** |
| CrisperWhisper | 156 / 55 | -0.2392 | -0.2706 | -0.0314 | (-0.0776 to +0.0149) | 0.182 | 0.292 |
| Google | 156 / 55 | -0.2392 | -0.2888 | -0.0496 | (-0.1037 to +0.0045) | 0.072 | 0.153 |
| Meta | 156 / 55 | -0.2392 | -0.2070 | +0.0322 | (-0.0304 to +0.0948) | 0.312 | 0.454 |
| Microsoft | 156 / 55 | -0.2392 | -0.2238 | +0.0154 | (-0.0550 to +0.0857) | 0.667 | 0.722 |
| Nemo | 156 / 55 | -0.2392 | -0.2216 | +0.0176 | (-0.0226 to +0.0578) | 0.389 | 0.519 |
| **Whisper** | **156 / 55** | **-0.2392** | **-0.1252** | **+0.1140** | **(+0.0663 to +0.1616)** | **<0.001** | **<0.001** |

***Picture description***

| **Type-token ratio** | **n (Dem / Con)** | **Human effect** | **ASR effect** | **Deviation (ASR - Human)** | **95% CI** | **p-value** | **p-FDR** |
| --- | --- | --- | --- | --- | --- | --- | --- |
| **Human (reference)** | **37 / 58** | **-0.0908** | **-** | **-** | **-** | **-** | **-** |
| AWS | 37 / 58 | -0.0908 | -0.0779 | +0.0129 | (-0.0065 to +0.0323) | 0.186 | 0.368 |
| AssemblyAI | 37 / 58 | -0.0908 | -0.0642 | +0.0266 | (-0.0038 to +0.0571) | 0.085 | 0.300 |
| CrisperWhisper | 37 / 58 | -0.0908 | -0.1017 | -0.0109 | (-0.0308 to +0.0090) | 0.274 | 0.462 |
| Google | 37 / 58 | -0.0908 | -0.0667 | +0.0240 | (+0.0039 to +0.0442) | 0.020 | 0.202 |
| **Meta** | **37 / 58** | **-0.0908** | **-0.0192** | **+0.0715** | **(+0.0291 to +0.1140)** | **0.002** | **0.048** |
| Microsoft | 37 / 58 | -0.0908 | -0.0932 | -0.0024 | (-0.0549 to +0.0502) | 0.927 | 0.973 |
| Nemo | 37 / 58 | -0.0908 | -0.0620 | +0.0287 | (+0.0002 to +0.0573) | 0.048 | 0.293 |
| Whisper | 37 / 58 | -0.0908 | -0.0786 | +0.0122 | (-0.0170 to +0.0414) | 0.404 | 0.589 |

| **Pronoun ratio** | **n (Dem / Con)** | **Human effect** | **ASR effect** | **Deviation (ASR - Human)** | **95% CI** | **p-value** | **p-FDR** |
| --- | --- | --- | --- | --- | --- | --- | --- |
| **Human (reference)** | **37 / 58** | **0.0162** | **-** | **-** | **-** | **-** | **-** |
| AWS | 37 / 58 | 0.0162 | 0.0232 | +0.0071 | (-0.0002 to +0.0144) | 0.056 | 0.293 |
| AssemblyAI | 37 / 58 | 0.0162 | 0.0192 | +0.0031 | (-0.0055 to +0.0117) | 0.477 | 0.610 |
| CrisperWhisper | 37 / 58 | 0.0162 | 0.0159 | -0.0002 | (-0.0059 to +0.0055) | 0.942 | 0.973 |
| Google | 37 / 58 | 0.0162 | 0.0246 | +0.0085 | (-0.0031 to +0.0200) | 0.147 | 0.335 |
| Meta | 37 / 58 | 0.0162 | 0.0156 | -0.0005 | (-0.0092 to +0.0081) | 0.900 | 0.973 |
| Microsoft | 37 / 58 | 0.0162 | 0.0118 | -0.0044 | (-0.0149 to +0.0061) | 0.405 | 0.589 |
| Nemo | 37 / 58 | 0.0162 | 0.0219 | +0.0057 | (-0.0019 to +0.0134) | 0.139 | 0.335 |
| Whisper | 37 / 58 | 0.0162 | 0.0215 | +0.0053 | (-0.0017 to +0.0123) | 0.133 | 0.335 |

| **Content-word ratio** | **n (Dem / Con)** | **Human effect** | **ASR effect** | **Deviation (ASR - Human)** | **95% CI** | **p-value** | **p-FDR** |
| --- | --- | --- | --- | --- | --- | --- | --- |
| **Human (reference)** | **37 / 58** | **0.0739** | **-** | **-** | **-** | **-** | **-** |
| AWS | 37 / 58 | 0.0739 | 0.0635 | -0.0104 | (-0.0251 to +0.0043) | 0.160 | 0.342 |
| AssemblyAI | 37 / 58 | 0.0739 | 0.0649 | -0.0091 | (-0.0245 to +0.0064) | 0.243 | 0.432 |
| CrisperWhisper | 37 / 58 | 0.0739 | 0.0645 | -0.0094 | (-0.0195 to +0.0006) | 0.064 | 0.293 |
| Google | 37 / 58 | 0.0739 | 0.0675 | -0.0065 | (-0.0232 to +0.0103) | 0.443 | 0.610 |
| Meta | 37 / 58 | 0.0739 | 0.0741 | +0.0002 | (-0.0147 to +0.0150) | 0.981 | 0.981 |
| Microsoft | 37 / 58 | 0.0739 | 0.0282 | -0.0457 | (-0.0854 to -0.0060) | 0.025 | 0.202 |
| Nemo | 37 / 58 | 0.0739 | 0.0592 | -0.0148 | (-0.0274 to -0.0021) | 0.023 | 0.202 |
| Whisper | 37 / 58 | 0.0739 | 0.0645 | -0.0094 | (-0.0239 to +0.0050) | 0.196 | 0.368 |

| **Mean word length** | **n (Dem / Con)** | **Human effect** | **ASR effect** | **Deviation (ASR - Human)** | **95% CI** | **p-value** | **p-FDR** |
| --- | --- | --- | --- | --- | --- | --- | --- |
| **Human (reference)** | **37 / 58** | **-0.1918** | **-** | **-** | **-** | **-** | **-** |
| AWS | 37 / 58 | -0.1918 | -0.2013 | -0.0095 | (-0.0656 to +0.0465) | 0.734 | 0.904 |
| AssemblyAI | 37 / 58 | -0.1918 | -0.1530 | +0.0387 | (-0.0121 to +0.0896) | 0.132 | 0.335 |
| CrisperWhisper | 37 / 58 | -0.1918 | -0.2445 | -0.0527 | (-0.1117 to +0.0063) | 0.079 | 0.300 |
| Google | 37 / 58 | -0.1918 | -0.1693 | +0.0225 | (-0.0381 to +0.0831) | 0.462 | 0.610 |
| Meta | 37 / 58 | -0.1918 | -0.1825 | +0.0093 | (-0.0933 to +0.1118) | 0.857 | 0.973 |
| Microsoft | 37 / 58 | -0.1918 | -0.1985 | -0.0067 | (-0.1164 to +0.1030) | 0.902 | 0.973 |
| Nemo | 37 / 58 | -0.1918 | -0.1513 | +0.0405 | (-0.0121 to +0.0931) | 0.128 | 0.335 |
| Whisper | 37 / 58 | -0.1918 | -0.1582 | +0.0335 | (-0.0314 to +0.0985) | 0.304 | 0.486 |

**Subgroup: Age group**

***Age <75 years***

| **Type-token ratio** | **n (Dem / Con)** | **Human effect** | **ASR effect** | **Deviation (ASR - Human)** | **95% CI** | **p-value** | **p-FDR** |
| --- | --- | --- | --- | --- | --- | --- | --- |
| **Human (reference)** | **147 / 103** | **-0.0685** | **-** | **-** | **-** | **-** | **-** |
| **AWS** | **147 / 103** | **-0.0685** | **-0.0471** | **+0.0214** | **(+0.0100 to +0.0327)** | **<0.001** | **0.003** |
| **AssemblyAI** | **147 / 103** | **-0.0685** | **-0.0437** | **+0.0249** | **(+0.0111 to +0.0386)** | **<0.001** | **0.004** |
| CrisperWhisper | 147 / 103 | -0.0685 | -0.0846 | -0.0161 | (-0.0310 to -0.0012) | 0.034 | 0.068 |
| Google | 147 / 103 | -0.0685 | -0.0556 | +0.0129 | (-0.0025 to +0.0282) | 0.100 | 0.161 |
| **Meta** | **147 / 103** | **-0.0685** | **0.0041** | **+0.0726** | **(+0.0510 to +0.0943)** | **<0.001** | **<0.001** |
| Microsoft | 147 / 103 | -0.0685 | -0.0689 | -0.0004 | (-0.0280 to +0.0273) | 0.978 | 0.982 |
| **Nemo** | **147 / 103** | **-0.0685** | **-0.0493** | **+0.0192** | **(+0.0058 to +0.0326)** | **0.005** | **0.021** |
| **Whisper** | **147 / 103** | **-0.0685** | **-0.0461** | **+0.0224** | **(+0.0094 to +0.0355)** | **<0.001** | **0.006** |

| **Pronoun ratio** | **n (Dem / Con)** | **Human effect** | **ASR effect** | **Deviation (ASR - Human)** | **95% CI** | **p-value** | **p-FDR** |
| --- | --- | --- | --- | --- | --- | --- | --- |
| **Human (reference)** | **147 / 103** | **0.0325** | **-** | **-** | **-** | **-** | **-** |
| **AWS** | **147 / 103** | **0.0325** | **0.0395** | **+0.0070** | **(+0.0021 to +0.0119)** | **0.005** | **0.021** |
| AssemblyAI | 147 / 103 | 0.0325 | 0.0329 | +0.0004 | (-0.0041 to +0.0049) | 0.861 | 0.919 |
| CrisperWhisper | 147 / 103 | 0.0325 | 0.0335 | +0.0010 | (-0.0041 to +0.0061) | 0.702 | 0.802 |
| Google | 147 / 103 | 0.0325 | 0.0383 | +0.0059 | (-0.0024 to +0.0141) | 0.163 | 0.244 |
| **Meta** | **147 / 103** | **0.0325** | **0.0224** | **-0.0101** | **(-0.0163 to -0.0039)** | **0.002** | **0.008** |
| Microsoft | 147 / 103 | 0.0325 | 0.0309 | -0.0015 | (-0.0102 to +0.0071) | 0.727 | 0.802 |
| Nemo | 147 / 103 | 0.0325 | 0.0344 | +0.0019 | (-0.0029 to +0.0067) | 0.442 | 0.565 |
| **Whisper** | **147 / 103** | **0.0325** | **0.0405** | **+0.0080** | **(+0.0022 to +0.0139)** | **0.007** | **0.022** |

| **Content-word ratio** | **n (Dem / Con)** | **Human effect** | **ASR effect** | **Deviation (ASR - Human)** | **95% CI** | **p-value** | **p-FDR** |
| --- | --- | --- | --- | --- | --- | --- | --- |
| **Human (reference)** | **147 / 103** | **0.0728** | **-** | **-** | **-** | **-** | **-** |
| **AWS** | **147 / 103** | **0.0728** | **0.0639** | **-0.0089** | **(-0.0153 to -0.0026)** | **0.006** | **0.021** |
| AssemblyAI | 147 / 103 | 0.0728 | 0.0667 | -0.0061 | (-0.0132 to +0.0010) | 0.094 | 0.159 |
| CrisperWhisper | 147 / 103 | 0.0728 | 0.0675 | -0.0052 | (-0.0112 to +0.0008) | 0.089 | 0.159 |
| **Google** | **147 / 103** | **0.0728** | **0.0609** | **-0.0119** | **(-0.0208 to -0.0029)** | **0.009** | **0.023** |
| Meta | 147 / 103 | 0.0728 | 0.0658 | -0.0070 | (-0.0169 to +0.0030) | 0.168 | 0.244 |
| **Microsoft** | **147 / 103** | **0.0728** | **0.0501** | **-0.0227** | **(-0.0390 to -0.0064)** | **0.007** | **0.021** |
| Nemo | 147 / 103 | 0.0728 | 0.0656 | -0.0071 | (-0.0137 to -0.0006) | 0.034 | 0.068 |
| **Whisper** | **147 / 103** | **0.0728** | **0.0618** | **-0.0109** | **(-0.0190 to -0.0029)** | **0.008** | **0.022** |

| **Mean word length** | **n (Dem / Con)** | **Human effect** | **ASR effect** | **Deviation (ASR - Human)** | **95% CI** | **p-value** | **p-FDR** |
| --- | --- | --- | --- | --- | --- | --- | --- |
| **Human (reference)** | **147 / 103** | **-0.2345** | **-** | **-** | **-** | **-** | **-** |
| AWS | 147 / 103 | -0.2345 | -0.2524 | -0.0179 | (-0.0535 to +0.0177) | 0.323 | 0.431 |
| **AssemblyAI** | **147 / 103** | **-0.2345** | **-0.1797** | **+0.0548** | **(+0.0130 to +0.0966)** | **0.010** | **0.024** |
| CrisperWhisper | 147 / 103 | -0.2345 | -0.2750 | -0.0406 | (-0.0815 to +0.0004) | 0.052 | 0.098 |
| Google | 147 / 103 | -0.2345 | -0.2504 | -0.0159 | (-0.0645 to +0.0327) | 0.519 | 0.639 |
| Meta | 147 / 103 | -0.2345 | -0.2226 | +0.0119 | (-0.0488 to +0.0725) | 0.700 | 0.802 |
| Microsoft | 147 / 103 | -0.2345 | -0.2337 | +0.0008 | (-0.0656 to +0.0671) | 0.982 | 0.982 |
| Nemo | 147 / 103 | -0.2345 | -0.2150 | +0.0194 | (-0.0156 to +0.0544) | 0.276 | 0.383 |
| **Whisper** | **147 / 103** | **-0.2345** | **-0.1503** | **+0.0841** | **(+0.0398 to +0.1285)** | **<0.001** | **0.003** |

***Age >=75 years***

| **Type-token ratio** | **n (Dem / Con)** | **Human effect** | **ASR effect** | **Deviation (ASR - Human)** | **95% CI** | **p-value** | **p-FDR** |
| --- | --- | --- | --- | --- | --- | --- | --- |
| **Human (reference)** | **27 / 10** | **-0.1079** | **-** | **-** | **-** | **-** | **-** |
| AWS | 27 / 10 | -0.1079 | -0.1254 | -0.0175 | (-0.0310 to -0.0040) | 0.013 | 0.068 |
| AssemblyAI | 27 / 10 | -0.1079 | -0.1066 | +0.0013 | (-0.0143 to +0.0169) | 0.862 | 0.894 |
| CrisperWhisper | 27 / 10 | -0.1079 | -0.1323 | -0.0243 | (-0.0749 to +0.0262) | 0.332 | 0.600 |
| Google | 27 / 10 | -0.1079 | -0.1397 | -0.0318 | (-0.0569 to -0.0066) | 0.015 | 0.068 |
| **Meta** | **27 / 10** | **-0.1079** | **-0.0543** | **+0.0537** | **(+0.0239 to +0.0835)** | **0.001** | **0.013** |
| Microsoft | 27 / 10 | -0.1079 | -0.0850 | +0.0229 | (+0.0021 to +0.0437) | 0.032 | 0.103 |
| Nemo | 27 / 10 | -0.1079 | -0.1055 | +0.0024 | (-0.0195 to +0.0244) | 0.817 | 0.894 |
| Whisper | 27 / 10 | -0.1079 | -0.1038 | +0.0042 | (-0.0157 to +0.0240) | 0.672 | 0.894 |

| **Pronoun ratio** | **n (Dem / Con)** | **Human effect** | **ASR effect** | **Deviation (ASR - Human)** | **95% CI** | **p-value** | **p-FDR** |
| --- | --- | --- | --- | --- | --- | --- | --- |
| **Human (reference)** | **27 / 10** | **0.0205** | **-** | **-** | **-** | **-** | **-** |
| AWS | 27 / 10 | 0.0205 | 0.0185 | -0.0020 | (-0.0262 to +0.0221) | 0.866 | 0.894 |
| AssemblyAI | 27 / 10 | 0.0205 | 0.0103 | -0.0102 | (-0.0265 to +0.0060) | 0.209 | 0.479 |
| CrisperWhisper | 27 / 10 | 0.0205 | 0.0139 | -0.0066 | (-0.0239 to +0.0106) | 0.439 | 0.703 |
| Google | 27 / 10 | 0.0205 | -0.0072 | -0.0278 | (-0.0486 to -0.0069) | 0.011 | 0.068 |
| Meta | 27 / 10 | 0.0205 | 0.0206 | +0.0001 | (-0.0188 to +0.0190) | 0.989 | 0.989 |
| Microsoft | 27 / 10 | 0.0205 | 0.0242 | +0.0037 | (-0.0085 to +0.0159) | 0.542 | 0.788 |
| Nemo | 27 / 10 | 0.0205 | 0.0250 | +0.0045 | (-0.0106 to +0.0195) | 0.536 | 0.788 |
| Whisper | 27 / 10 | 0.0205 | 0.0173 | -0.0032 | (-0.0253 to +0.0189) | 0.769 | 0.894 |

| **Content-word ratio** | **n (Dem / Con)** | **Human effect** | **ASR effect** | **Deviation (ASR - Human)** | **95% CI** | **p-value** | **p-FDR** |
| --- | --- | --- | --- | --- | --- | --- | --- |
| **Human (reference)** | **27 / 10** | **0.0767** | **-** | **-** | **-** | **-** | **-** |
| AWS | 27 / 10 | 0.0767 | 0.0622 | -0.0145 | (-0.0290 to +0.0000) | 0.051 | 0.147 |
| AssemblyAI | 27 / 10 | 0.0767 | 0.0641 | -0.0127 | (-0.0237 to -0.0016) | 0.026 | 0.103 |
| CrisperWhisper | 27 / 10 | 0.0767 | 0.0678 | -0.0089 | (-0.0319 to +0.0142) | 0.430 | 0.703 |
| Google | 27 / 10 | 0.0767 | 0.0680 | -0.0087 | (-0.0266 to +0.0092) | 0.327 | 0.600 |
| Meta | 27 / 10 | 0.0767 | 0.0743 | -0.0024 | (-0.0177 to +0.0129) | 0.753 | 0.894 |
| Microsoft | 27 / 10 | 0.0767 | 0.0665 | -0.0102 | (-0.0254 to +0.0050) | 0.182 | 0.447 |
| **Nemo** | **27 / 10** | **0.0767** | **0.0511** | **-0.0256** | **(-0.0381 to -0.0132)** | **<0.001** | **0.006** |
| **Whisper** | **27 / 10** | **0.0767** | **0.0612** | **-0.0156** | **(-0.0257 to -0.0054)** | **0.004** | **0.030** |

| **Mean word length** | **n (Dem / Con)** | **Human effect** | **ASR effect** | **Deviation (ASR - Human)** | **95% CI** | **p-value** | **p-FDR** |
| --- | --- | --- | --- | --- | --- | --- | --- |
| **Human (reference)** | **27 / 10** | **-0.3415** | **-** | **-** | **-** | **-** | **-** |
| AWS | 27 / 10 | -0.3415 | -0.3486 | -0.0071 | (-0.0824 to +0.0683) | 0.845 | 0.894 |
| AssemblyAI | 27 / 10 | -0.3415 | -0.2901 | +0.0514 | (-0.0389 to +0.1417) | 0.242 | 0.517 |
| CrisperWhisper | 27 / 10 | -0.3415 | -0.3899 | -0.0484 | (-0.1496 to +0.0528) | 0.337 | 0.600 |
| Google | 27 / 10 | -0.3415 | -0.3191 | +0.0224 | (-0.1236 to +0.1684) | 0.745 | 0.894 |
| Meta | 27 / 10 | -0.3415 | -0.2243 | +0.1172 | (-0.0046 to +0.2391) | 0.059 | 0.157 |
| Microsoft | 27 / 10 | -0.3415 | -0.2341 | +0.1075 | (+0.0116 to +0.2034) | 0.030 | 0.103 |
| Nemo | 27 / 10 | -0.3415 | -0.3256 | +0.0160 | (-0.0553 to +0.0872) | 0.642 | 0.893 |
| **Whisper** | **27 / 10** | **-0.3415** | **-0.1792** | **+0.1624** | **(+0.0740 to +0.2507)** | **<0.001** | **0.011** |

**Subgroup: Sex**

***Male***

| **Type-token ratio** | **n (Dem / Con)** | **Human effect** | **ASR effect** | **Deviation (ASR - Human)** | **95% CI** | **p-value** | **p-FDR** |
| --- | --- | --- | --- | --- | --- | --- | --- |
| **Human (reference)** | **112 / 53** | **-0.0570** | **-** | **-** | **-** | **-** | **-** |
| AWS | 112 / 53 | -0.0570 | -0.0441 | +0.0129 | (-0.0001 to +0.0259) | 0.052 | 0.184 |
| AssemblyAI | 112 / 53 | -0.0570 | -0.0363 | +0.0207 | (+0.0037 to +0.0378) | 0.018 | 0.093 |
| CrisperWhisper | 112 / 53 | -0.0570 | -0.0700 | -0.0130 | (-0.0282 to +0.0022) | 0.094 | 0.231 |
| Google | 112 / 53 | -0.0570 | -0.0535 | +0.0035 | (-0.0151 to +0.0220) | 0.712 | 0.844 |
| **Meta** | **112 / 53** | **-0.0570** | **0.0068** | **+0.0638** | **(+0.0368 to +0.0907)** | **<0.001** | **<0.001** |
| Microsoft | 112 / 53 | -0.0570 | -0.0641 | -0.0071 | (-0.0375 to +0.0233) | 0.646 | 0.844 |
| Nemo | 112 / 53 | -0.0570 | -0.0460 | +0.0110 | (-0.0042 to +0.0262) | 0.153 | 0.314 |
| Whisper | 112 / 53 | -0.0570 | -0.0395 | +0.0175 | (+0.0022 to +0.0328) | 0.025 | 0.115 |

| **Pronoun ratio** | **n (Dem / Con)** | **Human effect** | **ASR effect** | **Deviation (ASR - Human)** | **95% CI** | **p-value** | **p-FDR** |
| --- | --- | --- | --- | --- | --- | --- | --- |
| **Human (reference)** | **112 / 53** | **0.0223** | **-** | **-** | **-** | **-** | **-** |
| AWS | 112 / 53 | 0.0223 | 0.0238 | +0.0015 | (-0.0059 to +0.0088) | 0.697 | 0.844 |
| AssemblyAI | 112 / 53 | 0.0223 | 0.0202 | -0.0021 | (-0.0087 to +0.0045) | 0.529 | 0.736 |
| CrisperWhisper | 112 / 53 | 0.0223 | 0.0217 | -0.0006 | (-0.0050 to +0.0038) | 0.773 | 0.859 |
| Google | 112 / 53 | 0.0223 | 0.0169 | -0.0054 | (-0.0145 to +0.0037) | 0.240 | 0.407 |
| **Meta** | **112 / 53** | **0.0223** | **0.0092** | **-0.0132** | **(-0.0216 to -0.0047)** | **0.003** | **0.027** |
| Microsoft | 112 / 53 | 0.0223 | 0.0167 | -0.0056 | (-0.0133 to +0.0021) | 0.154 | 0.314 |
| Nemo | 112 / 53 | 0.0223 | 0.0226 | +0.0002 | (-0.0058 to +0.0062) | 0.940 | 0.940 |
| Whisper | 112 / 53 | 0.0223 | 0.0269 | +0.0046 | (-0.0031 to +0.0122) | 0.242 | 0.407 |

| **Content-word ratio** | **n (Dem / Con)** | **Human effect** | **ASR effect** | **Deviation (ASR - Human)** | **95% CI** | **p-value** | **p-FDR** |
| --- | --- | --- | --- | --- | --- | --- | --- |
| **Human (reference)** | **112 / 53** | **0.0665** | **-** | **-** | **-** | **-** | **-** |
| AWS | 112 / 53 | 0.0665 | 0.0610 | -0.0055 | (-0.0135 to +0.0024) | 0.173 | 0.325 |
| AssemblyAI | 112 / 53 | 0.0665 | 0.0581 | -0.0084 | (-0.0176 to +0.0008) | 0.074 | 0.199 |
| CrisperWhisper | 112 / 53 | 0.0665 | 0.0597 | -0.0069 | (-0.0139 to +0.0002) | 0.058 | 0.184 |
| **Google** | **112 / 53** | **0.0665** | **0.0511** | **-0.0154** | **(-0.0261 to -0.0047)** | **0.005** | **0.039** |
| Meta | 112 / 53 | 0.0665 | 0.0594 | -0.0072 | (-0.0201 to +0.0057) | 0.274 | 0.439 |
| Microsoft | 112 / 53 | 0.0665 | 0.0505 | -0.0160 | (-0.0332 to +0.0012) | 0.067 | 0.196 |
| Nemo | 112 / 53 | 0.0665 | 0.0606 | -0.0060 | (-0.0143 to +0.0023) | 0.157 | 0.314 |
| Whisper | 112 / 53 | 0.0665 | 0.0561 | -0.0105 | (-0.0207 to -0.0002) | 0.045 | 0.180 |

| **Mean word length** | **n (Dem / Con)** | **Human effect** | **ASR effect** | **Deviation (ASR - Human)** | **95% CI** | **p-value** | **p-FDR** |
| --- | --- | --- | --- | --- | --- | --- | --- |
| **Human (reference)** | **112 / 53** | **-0.2332** | **-** | **-** | **-** | **-** | **-** |
| AWS | 112 / 53 | -0.2332 | -0.2275 | +0.0058 | (-0.0403 to +0.0519) | 0.805 | 0.859 |
| AssemblyAI | 112 / 53 | -0.2332 | -0.1702 | +0.0630 | (+0.0136 to +0.1125) | 0.013 | 0.081 |
| CrisperWhisper | 112 / 53 | -0.2332 | -0.2532 | -0.0199 | (-0.0592 to +0.0194) | 0.318 | 0.484 |
| Google | 112 / 53 | -0.2332 | -0.2084 | +0.0248 | (-0.0296 to +0.0792) | 0.369 | 0.537 |
| Meta | 112 / 53 | -0.2332 | -0.2262 | +0.0070 | (-0.0639 to +0.0780) | 0.846 | 0.873 |
| Microsoft | 112 / 53 | -0.2332 | -0.2186 | +0.0146 | (-0.0566 to +0.0858) | 0.686 | 0.844 |
| Nemo | 112 / 53 | -0.2332 | -0.2272 | +0.0060 | (-0.0370 to +0.0490) | 0.783 | 0.859 |
| **Whisper** | **112 / 53** | **-0.2332** | **-0.1381** | **+0.0951** | **(+0.0436 to +0.1466)** | **<0.001** | **0.006** |

***Female***

| **Type-token ratio** | **n (Dem / Con)** | **Human effect** | **ASR effect** | **Deviation (ASR - Human)** | **95% CI** | **p-value** | **p-FDR** |
| --- | --- | --- | --- | --- | --- | --- | --- |
| **Human (reference)** | **62 / 60** | **-0.0895** | **-** | **-** | **-** | **-** | **-** |
| AWS | 62 / 60 | -0.0895 | -0.0687 | +0.0208 | (+0.0041 to +0.0374) | 0.015 | 0.061 |
| **AssemblyAI** | **62 / 60** | **-0.0895** | **-0.0672** | **+0.0223** | **(+0.0080 to +0.0366)** | **0.003** | **0.022** |
| CrisperWhisper | 62 / 60 | -0.0895 | -0.1177 | -0.0282 | (-0.0574 to +0.0010) | 0.058 | 0.129 |
| Google | 62 / 60 | -0.0895 | -0.0740 | +0.0155 | (-0.0069 to +0.0380) | 0.172 | 0.263 |
| **Meta** | **62 / 60** | **-0.0895** | **-0.0181** | **+0.0714** | **(+0.0473 to +0.0954)** | **<0.001** | **<0.001** |
| Microsoft | 62 / 60 | -0.0895 | -0.0775 | +0.0120 | (-0.0285 to +0.0525) | 0.555 | 0.658 |
| **Nemo** | **62 / 60** | **-0.0895** | **-0.0624** | **+0.0271** | **(+0.0077 to +0.0466)** | **0.007** | **0.037** |
| Whisper | 62 / 60 | -0.0895 | -0.0679 | +0.0216 | (+0.0020 to +0.0411) | 0.031 | 0.091 |

| **Pronoun ratio** | **n (Dem / Con)** | **Human effect** | **ASR effect** | **Deviation (ASR - Human)** | **95% CI** | **p-value** | **p-FDR** |
| --- | --- | --- | --- | --- | --- | --- | --- |
| **Human (reference)** | **62 / 60** | **0.0424** | **-** | **-** | **-** | **-** | **-** |
| **AWS** | **62 / 60** | **0.0424** | **0.0539** | **+0.0115** | **(+0.0035 to +0.0196)** | **0.006** | **0.036** |
| AssemblyAI | 62 / 60 | 0.0424 | 0.0417 | -0.0007 | (-0.0062 to +0.0048) | 0.796 | 0.849 |
| CrisperWhisper | 62 / 60 | 0.0424 | 0.0435 | +0.0011 | (-0.0107 to +0.0129) | 0.849 | 0.873 |
| Google | 62 / 60 | 0.0424 | 0.0560 | +0.0136 | (-0.0001 to +0.0274) | 0.052 | 0.127 |
| Meta | 62 / 60 | 0.0424 | 0.0401 | -0.0023 | (-0.0108 to +0.0063) | 0.596 | 0.681 |
| Microsoft | 62 / 60 | 0.0424 | 0.0484 | +0.0060 | (-0.0107 to +0.0227) | 0.477 | 0.597 |
| Nemo | 62 / 60 | 0.0424 | 0.0479 | +0.0055 | (-0.0014 to +0.0123) | 0.117 | 0.196 |
| Whisper | 62 / 60 | 0.0424 | 0.0507 | +0.0083 | (-0.0021 to +0.0187) | 0.117 | 0.196 |

| **Content-word ratio** | **n (Dem / Con)** | **Human effect** | **ASR effect** | **Deviation (ASR - Human)** | **95% CI** | **p-value** | **p-FDR** |
| --- | --- | --- | --- | --- | --- | --- | --- |
| **Human (reference)** | **62 / 60** | **0.0800** | **-** | **-** | **-** | **-** | **-** |
| **AWS** | **62 / 60** | **0.0800** | **0.0655** | **-0.0144** | **(-0.0225 to -0.0064)** | **<0.001** | **0.010** |
| AssemblyAI | 62 / 60 | 0.0800 | 0.0768 | -0.0031 | (-0.0094 to +0.0032) | 0.326 | 0.454 |
| CrisperWhisper | 62 / 60 | 0.0800 | 0.0783 | -0.0016 | (-0.0121 to +0.0088) | 0.756 | 0.834 |
| Google | 62 / 60 | 0.0800 | 0.0752 | -0.0048 | (-0.0175 to +0.0080) | 0.458 | 0.597 |
| Meta | 62 / 60 | 0.0800 | 0.0765 | -0.0034 | (-0.0132 to +0.0063) | 0.485 | 0.597 |
| Microsoft | 62 / 60 | 0.0800 | 0.0513 | -0.0286 | (-0.0538 to -0.0035) | 0.026 | 0.091 |
| **Nemo** | **62 / 60** | **0.0800** | **0.0664** | **-0.0136** | **(-0.0223 to -0.0049)** | **0.003** | **0.022** |
| Whisper | 62 / 60 | 0.0800 | 0.0700 | -0.0099 | (-0.0190 to -0.0009) | 0.031 | 0.091 |

| **Mean word length** | **n (Dem / Con)** | **Human effect** | **ASR effect** | **Deviation (ASR - Human)** | **95% CI** | **p-value** | **p-FDR** |
| --- | --- | --- | --- | --- | --- | --- | --- |
| **Human (reference)** | **62 / 60** | **-0.2125** | **-** | **-** | **-** | **-** | **-** |
| AWS | 62 / 60 | -0.2125 | -0.2598 | -0.0473 | (-0.0911 to -0.0034) | 0.035 | 0.093 |
| AssemblyAI | 62 / 60 | -0.2125 | -0.1674 | +0.0451 | (-0.0116 to +0.1019) | 0.118 | 0.196 |
| CrisperWhisper | 62 / 60 | -0.2125 | -0.2875 | -0.0750 | (-0.1543 to +0.0044) | 0.064 | 0.129 |
| Google | 62 / 60 | -0.2125 | -0.2709 | -0.0584 | (-0.1328 to +0.0160) | 0.123 | 0.196 |
| Meta | 62 / 60 | -0.2125 | -0.1663 | +0.0463 | (-0.0402 to +0.1327) | 0.290 | 0.422 |
| Microsoft | 62 / 60 | -0.2125 | -0.2044 | +0.0082 | (-0.0939 to +0.1103) | 0.873 | 0.873 |
| Nemo | 62 / 60 | -0.2125 | -0.1682 | +0.0443 | (-0.0027 to +0.0914) | 0.065 | 0.129 |
| **Whisper** | **62 / 60** | **-0.2125** | **-0.1185** | **+0.0940** | **(+0.0252 to +0.1629)** | **0.008** | **0.037** |

**Subgroup: Transcript length (word count)**

***Q1 (<=57 words)***

| **Type-token ratio** | **n (Dem / Con)** | **Human effect** | **ASR effect** | **Deviation (ASR - Human)** | **95% CI** | **p-value** | **p-FDR** |
| --- | --- | --- | --- | --- | --- | --- | --- |
| **Human (reference)** | **42 / 35** | **-0.0809** | **-** | **-** | **-** | **-** | **-** |
| **AWS** | **42 / 35** | **-0.0809** | **-0.0185** | **+0.0624** | **(+0.0296 to +0.0953)** | **<0.001** | **0.004** |
| **AssemblyAI** | **42 / 35** | **-0.0809** | **0.0017** | **+0.0826** | **(+0.0418 to +0.1234)** | **<0.001** | **0.003** |
| CrisperWhisper | 42 / 35 | -0.0809 | -0.1062 | -0.0253 | (-0.0728 to +0.0222) | 0.290 | 0.421 |
| Google | 42 / 35 | -0.0809 | -0.0654 | +0.0155 | (-0.0272 to +0.0582) | 0.470 | 0.618 |
| **Meta** | **42 / 35** | **-0.0809** | **0.0545** | **+0.1354** | **(+0.0777 to +0.1930)** | **<0.001** | **<0.001** |
| Microsoft | 42 / 35 | -0.0809 | -0.0842 | -0.0033 | (-0.0767 to +0.0702) | 0.929 | 0.929 |
| **Nemo** | **42 / 35** | **-0.0809** | **-0.0221** | **+0.0588** | **(+0.0164 to +0.1011)** | **0.008** | **0.041** |
| Whisper | 42 / 35 | -0.0809 | -0.0345 | +0.0464 | (+0.0045 to +0.0882) | 0.031 | 0.100 |

| **Pronoun ratio** | **n (Dem / Con)** | **Human effect** | **ASR effect** | **Deviation (ASR - Human)** | **95% CI** | **p-value** | **p-FDR** |
| --- | --- | --- | --- | --- | --- | --- | --- |
| **Human (reference)** | **42 / 35** | **0.0389** | **-** | **-** | **-** | **-** | **-** |
| AWS | 42 / 35 | 0.0389 | 0.0518 | +0.0129 | (-0.0074 to +0.0332) | 0.207 | 0.349 |
| AssemblyAI | 42 / 35 | 0.0389 | 0.0366 | -0.0023 | (-0.0174 to +0.0128) | 0.758 | 0.809 |
| CrisperWhisper | 42 / 35 | 0.0389 | 0.0435 | +0.0047 | (-0.0116 to +0.0210) | 0.567 | 0.689 |
| Google | 42 / 35 | 0.0389 | 0.0549 | +0.0160 | (-0.0099 to +0.0419) | 0.219 | 0.351 |
| Meta | 42 / 35 | 0.0389 | 0.0211 | -0.0177 | (-0.0351 to -0.0003) | 0.046 | 0.122 |
| Microsoft | 42 / 35 | 0.0389 | 0.0457 | +0.0068 | (-0.0187 to +0.0323) | 0.594 | 0.689 |
| Nemo | 42 / 35 | 0.0389 | 0.0374 | -0.0014 | (-0.0165 to +0.0137) | 0.849 | 0.877 |
| Whisper | 42 / 35 | 0.0389 | 0.0582 | +0.0194 | (-0.0015 to +0.0402) | 0.068 | 0.167 |

| **Content-word ratio** | **n (Dem / Con)** | **Human effect** | **ASR effect** | **Deviation (ASR - Human)** | **95% CI** | **p-value** | **p-FDR** |
| --- | --- | --- | --- | --- | --- | --- | --- |
| **Human (reference)** | **42 / 35** | **0.1490** | **-** | **-** | **-** | **-** | **-** |
| AWS | 42 / 35 | 0.1490 | 0.1356 | -0.0134 | (-0.0308 to +0.0041) | 0.131 | 0.248 |
| AssemblyAI | 42 / 35 | 0.1490 | 0.1288 | -0.0202 | (-0.0428 to +0.0024) | 0.079 | 0.168 |
| CrisperWhisper | 42 / 35 | 0.1490 | 0.1377 | -0.0112 | (-0.0277 to +0.0053) | 0.178 | 0.316 |
| Google | 42 / 35 | 0.1490 | 0.1237 | -0.0252 | (-0.0477 to -0.0027) | 0.029 | 0.100 |
| Meta | 42 / 35 | 0.1490 | 0.1163 | -0.0327 | (-0.0628 to -0.0025) | 0.034 | 0.100 |
| Microsoft | 42 / 35 | 0.1490 | 0.1243 | -0.0247 | (-0.0520 to +0.0025) | 0.075 | 0.168 |
| Nemo | 42 / 35 | 0.1490 | 0.1367 | -0.0123 | (-0.0284 to +0.0038) | 0.132 | 0.248 |
| Whisper | 42 / 35 | 0.1490 | 0.1227 | -0.0263 | (-0.0491 to -0.0036) | 0.024 | 0.100 |

| **Mean word length** | **n (Dem / Con)** | **Human effect** | **ASR effect** | **Deviation (ASR - Human)** | **95% CI** | **p-value** | **p-FDR** |
| --- | --- | --- | --- | --- | --- | --- | --- |
| **Human (reference)** | **42 / 35** | **-0.4286** | **-** | **-** | **-** | **-** | **-** |
| AWS | 42 / 35 | -0.4286 | -0.4451 | -0.0165 | (-0.1078 to +0.0749) | 0.719 | 0.793 |
| **AssemblyAI** | **42 / 35** | **-0.4286** | **-0.2678** | **+0.1608** | **(+0.0516 to +0.2700)** | **0.005** | **0.038** |
| CrisperWhisper | 42 / 35 | -0.4286 | -0.4961 | -0.0674 | (-0.1881 to +0.0532) | 0.267 | 0.406 |
| Google | 42 / 35 | -0.4286 | -0.4806 | -0.0519 | (-0.1648 to +0.0610) | 0.362 | 0.503 |
| Meta | 42 / 35 | -0.4286 | -0.4693 | -0.0407 | (-0.1970 to +0.1156) | 0.603 | 0.689 |
| Microsoft | 42 / 35 | -0.4286 | -0.3708 | +0.0578 | (-0.1068 to +0.2224) | 0.483 | 0.618 |
| Nemo | 42 / 35 | -0.4286 | -0.3357 | +0.0929 | (+0.0072 to +0.1786) | 0.034 | 0.100 |
| **Whisper** | **42 / 35** | **-0.4286** | **-0.2707** | **+0.1579** | **(+0.0441 to +0.2718)** | **0.007** | **0.041** |

***Q2 (58-79 words)***

| **Type-token ratio** | **n (Dem / Con)** | **Human effect** | **ASR effect** | **Deviation (ASR - Human)** | **95% CI** | **p-value** | **p-FDR** |
| --- | --- | --- | --- | --- | --- | --- | --- |
| **Human (reference)** | **36 / 41** | **-0.0513** | **-** | **-** | **-** | **-** | **-** |
| AWS | 36 / 41 | -0.0513 | -0.0400 | +0.0114 | (-0.0055 to +0.0282) | 0.181 | 0.386 |
| AssemblyAI | 36 / 41 | -0.0513 | -0.0423 | +0.0091 | (-0.0073 to +0.0254) | 0.271 | 0.482 |
| CrisperWhisper | 36 / 41 | -0.0513 | -0.0812 | -0.0299 | (-0.0622 to +0.0025) | 0.070 | 0.203 |
| Google | 36 / 41 | -0.0513 | -0.0337 | +0.0176 | (-0.0068 to +0.0420) | 0.153 | 0.350 |
| **Meta** | **36 / 41** | **-0.0513** | **0.0137** | **+0.0650** | **(+0.0295 to +0.1005)** | **<0.001** | **0.019** |
| Microsoft | 36 / 41 | -0.0513 | -0.0369 | +0.0144 | (-0.0296 to +0.0584) | 0.511 | 0.682 |
| Nemo | 36 / 41 | -0.0513 | -0.0306 | +0.0208 | (+0.0030 to +0.0385) | 0.023 | 0.146 |
| Whisper | 36 / 41 | -0.0513 | -0.0231 | +0.0282 | (-0.0018 to +0.0582) | 0.065 | 0.203 |

| **Pronoun ratio** | **n (Dem / Con)** | **Human effect** | **ASR effect** | **Deviation (ASR - Human)** | **95% CI** | **p-value** | **p-FDR** |
| --- | --- | --- | --- | --- | --- | --- | --- |
| **Human (reference)** | **36 / 41** | **0.0290** | **-** | **-** | **-** | **-** | **-** |
| AWS | 36 / 41 | 0.0290 | 0.0339 | +0.0050 | (-0.0040 to +0.0140) | 0.270 | 0.482 |
| AssemblyAI | 36 / 41 | 0.0290 | 0.0277 | -0.0012 | (-0.0073 to +0.0048) | 0.682 | 0.809 |
| CrisperWhisper | 36 / 41 | 0.0290 | 0.0250 | -0.0040 | (-0.0146 to +0.0066) | 0.450 | 0.680 |
| Google | 36 / 41 | 0.0290 | 0.0244 | -0.0046 | (-0.0172 to +0.0080) | 0.468 | 0.680 |
| Meta | 36 / 41 | 0.0290 | 0.0223 | -0.0066 | (-0.0190 to +0.0057) | 0.288 | 0.486 |
| Microsoft | 36 / 41 | 0.0290 | 0.0301 | +0.0012 | (-0.0126 to +0.0149) | 0.865 | 0.923 |
| Nemo | 36 / 41 | 0.0290 | 0.0370 | +0.0081 | (-0.0004 to +0.0165) | 0.060 | 0.203 |
| Whisper | 36 / 41 | 0.0290 | 0.0285 | -0.0004 | (-0.0112 to +0.0103) | 0.936 | 0.936 |

| **Content-word ratio** | **n (Dem / Con)** | **Human effect** | **ASR effect** | **Deviation (ASR - Human)** | **95% CI** | **p-value** | **p-FDR** |
| --- | --- | --- | --- | --- | --- | --- | --- |
| **Human (reference)** | **36 / 41** | **0.0544** | **-** | **-** | **-** | **-** | **-** |
| **AWS** | **36 / 41** | **0.0544** | **0.0371** | **-0.0173** | **(-0.0289 to -0.0057)** | **0.004** | **0.046** |
| AssemblyAI | 36 / 41 | 0.0544 | 0.0493 | -0.0051 | (-0.0129 to +0.0027) | 0.199 | 0.398 |
| CrisperWhisper | 36 / 41 | 0.0544 | 0.0526 | -0.0019 | (-0.0202 to +0.0165) | 0.839 | 0.923 |
| Google | 36 / 41 | 0.0544 | 0.0489 | -0.0055 | (-0.0216 to +0.0105) | 0.492 | 0.682 |
| Meta | 36 / 41 | 0.0544 | 0.0481 | -0.0063 | (-0.0215 to +0.0089) | 0.410 | 0.656 |
| **Microsoft** | **36 / 41** | **0.0544** | **0.0258** | **-0.0286** | **(-0.0470 to -0.0102)** | **0.003** | **0.046** |
| Nemo | 36 / 41 | 0.0544 | 0.0416 | -0.0128 | (-0.0258 to +0.0002) | 0.053 | 0.203 |
| Whisper | 36 / 41 | 0.0544 | 0.0425 | -0.0119 | (-0.0254 to +0.0016) | 0.083 | 0.221 |

| **Mean word length** | **n (Dem / Con)** | **Human effect** | **ASR effect** | **Deviation (ASR - Human)** | **95% CI** | **p-value** | **p-FDR** |
| --- | --- | --- | --- | --- | --- | --- | --- |
| **Human (reference)** | **36 / 41** | **-0.2286** | **-** | **-** | **-** | **-** | **-** |
| AWS | 36 / 41 | -0.2286 | -0.3144 | -0.0858 | (-0.1487 to -0.0229) | 0.008 | 0.066 |
| AssemblyAI | 36 / 41 | -0.2286 | -0.2371 | -0.0084 | (-0.0718 to +0.0550) | 0.791 | 0.904 |
| CrisperWhisper | 36 / 41 | -0.2286 | -0.3177 | -0.0890 | (-0.1852 to +0.0071) | 0.069 | 0.203 |
| Google | 36 / 41 | -0.2286 | -0.2353 | -0.0067 | (-0.1084 to +0.0951) | 0.896 | 0.925 |
| Meta | 36 / 41 | -0.2286 | -0.1520 | +0.0766 | (-0.0178 to +0.1711) | 0.110 | 0.270 |
| Microsoft | 36 / 41 | -0.2286 | -0.2600 | -0.0314 | (-0.1615 to +0.0988) | 0.629 | 0.774 |
| Nemo | 36 / 41 | -0.2286 | -0.2102 | +0.0184 | (-0.0517 to +0.0885) | 0.600 | 0.768 |
| Whisper | 36 / 41 | -0.2286 | -0.1235 | +0.1052 | (+0.0018 to +0.2086) | 0.046 | 0.203 |

***Q3 (80-123 words)***

| **Type-token ratio** | **n (Dem / Con)** | **Human effect** | **ASR effect** | **Deviation (ASR - Human)** | **95% CI** | **p-value** | **p-FDR** |
| --- | --- | --- | --- | --- | --- | --- | --- |
| **Human (reference)** | **51 / 25** | **-0.0359** | **-** | **-** | **-** | **-** | **-** |
| AWS | 51 / 25 | -0.0359 | -0.0255 | +0.0104 | (-0.0053 to +0.0261) | 0.192 | 0.626 |
| AssemblyAI | 51 / 25 | -0.0359 | -0.0258 | +0.0101 | (-0.0072 to +0.0273) | 0.248 | 0.626 |
| CrisperWhisper | 51 / 25 | -0.0359 | -0.0482 | -0.0123 | (-0.0339 to +0.0092) | 0.256 | 0.626 |
| Google | 51 / 25 | -0.0359 | -0.0268 | +0.0090 | (-0.0147 to +0.0328) | 0.452 | 0.657 |
| **Meta** | **51 / 25** | **-0.0359** | **0.0234** | **+0.0592** | **(+0.0306 to +0.0879)** | **<0.001** | **0.003** |
| Microsoft | 51 / 25 | -0.0359 | -0.0280 | +0.0079 | (-0.0257 to +0.0415) | 0.641 | 0.707 |
| Nemo | 51 / 25 | -0.0359 | -0.0287 | +0.0071 | (-0.0114 to +0.0257) | 0.447 | 0.657 |
| Whisper | 51 / 25 | -0.0359 | -0.0212 | +0.0146 | (-0.0016 to +0.0308) | 0.076 | 0.346 |

| **Pronoun ratio** | **n (Dem / Con)** | **Human effect** | **ASR effect** | **Deviation (ASR - Human)** | **95% CI** | **p-value** | **p-FDR** |
| --- | --- | --- | --- | --- | --- | --- | --- |
| **Human (reference)** | **51 / 25** | **0.0243** | **-** | **-** | **-** | **-** | **-** |
| AWS | 51 / 25 | 0.0243 | 0.0319 | +0.0076 | (-0.0004 to +0.0155) | 0.063 | 0.346 |
| AssemblyAI | 51 / 25 | 0.0243 | 0.0276 | +0.0033 | (-0.0034 to +0.0100) | 0.333 | 0.626 |
| CrisperWhisper | 51 / 25 | 0.0243 | 0.0214 | -0.0028 | (-0.0108 to +0.0051) | 0.477 | 0.660 |
| Google | 51 / 25 | 0.0243 | 0.0204 | -0.0039 | (-0.0139 to +0.0061) | 0.439 | 0.657 |
| Meta | 51 / 25 | 0.0243 | 0.0199 | -0.0044 | (-0.0140 to +0.0053) | 0.370 | 0.657 |
| Microsoft | 51 / 25 | 0.0243 | 0.0276 | +0.0033 | (-0.0084 to +0.0150) | 0.578 | 0.660 |
| Nemo | 51 / 25 | 0.0243 | 0.0277 | +0.0034 | (-0.0027 to +0.0095) | 0.275 | 0.626 |
| Whisper | 51 / 25 | 0.0243 | 0.0310 | +0.0067 | (-0.0007 to +0.0142) | 0.075 | 0.346 |

| **Content-word ratio** | **n (Dem / Con)** | **Human effect** | **ASR effect** | **Deviation (ASR - Human)** | **95% CI** | **p-value** | **p-FDR** |
| --- | --- | --- | --- | --- | --- | --- | --- |
| **Human (reference)** | **51 / 25** | **0.0531** | **-** | **-** | **-** | **-** | **-** |
| AWS | 51 / 25 | 0.0531 | 0.0472 | -0.0060 | (-0.0161 to +0.0041) | 0.239 | 0.626 |
| AssemblyAI | 51 / 25 | 0.0531 | 0.0506 | -0.0026 | (-0.0111 to +0.0060) | 0.550 | 0.660 |
| CrisperWhisper | 51 / 25 | 0.0531 | 0.0519 | -0.0012 | (-0.0140 to +0.0116) | 0.852 | 0.852 |
| Google | 51 / 25 | 0.0531 | 0.0453 | -0.0078 | (-0.0232 to +0.0075) | 0.313 | 0.626 |
| Meta | 51 / 25 | 0.0531 | 0.0564 | +0.0033 | (-0.0082 to +0.0148) | 0.569 | 0.660 |
| Microsoft | 51 / 25 | 0.0531 | 0.0460 | -0.0072 | (-0.0324 to +0.0181) | 0.574 | 0.660 |
| Nemo | 51 / 25 | 0.0531 | 0.0447 | -0.0084 | (-0.0200 to +0.0031) | 0.150 | 0.599 |
| Whisper | 51 / 25 | 0.0531 | 0.0497 | -0.0035 | (-0.0147 to +0.0078) | 0.542 | 0.660 |

| **Mean word length** | **n (Dem / Con)** | **Human effect** | **ASR effect** | **Deviation (ASR - Human)** | **95% CI** | **p-value** | **p-FDR** |
| --- | --- | --- | --- | --- | --- | --- | --- |
| **Human (reference)** | **51 / 25** | **-0.1944** | **-** | **-** | **-** | **-** | **-** |
| AWS | 51 / 25 | -0.1944 | -0.2101 | -0.0157 | (-0.0532 to +0.0219) | 0.407 | 0.657 |
| AssemblyAI | 51 / 25 | -0.1944 | -0.1883 | +0.0061 | (-0.0432 to +0.0553) | 0.805 | 0.831 |
| CrisperWhisper | 51 / 25 | -0.1944 | -0.2448 | -0.0504 | (-0.1041 to +0.0033) | 0.065 | 0.346 |
| Google | 51 / 25 | -0.1944 | -0.2053 | -0.0109 | (-0.0865 to +0.0647) | 0.774 | 0.826 |
| Meta | 51 / 25 | -0.1944 | -0.2297 | -0.0353 | (-0.1025 to +0.0320) | 0.300 | 0.626 |
| Microsoft | 51 / 25 | -0.1944 | -0.1553 | +0.0391 | (-0.0207 to +0.0989) | 0.197 | 0.626 |
| Nemo | 51 / 25 | -0.1944 | -0.2415 | -0.0470 | (-0.0928 to -0.0013) | 0.044 | 0.346 |
| Whisper | 51 / 25 | -0.1944 | -0.1365 | +0.0579 | (+0.0098 to +0.1059) | 0.019 | 0.302 |

***Q4 (>123 words)***

| **Type-token ratio** | **n (Dem / Con)** | **Human effect** | **ASR effect** | **Deviation (ASR - Human)** | **95% CI** | **p-value** | **p-FDR** |
| --- | --- | --- | --- | --- | --- | --- | --- |
| **Human (reference)** | **64 / 12** | **0.0134** | **-** | **-** | **-** | **-** | **-** |
| AWS | 64 / 12 | 0.0134 | 0.0116 | -0.0018 | (-0.0179 to +0.0143) | 0.814 | 0.898 |
| AssemblyAI | 64 / 12 | 0.0134 | 0.0200 | +0.0066 | (-0.0118 to +0.0249) | 0.462 | 0.695 |
| CrisperWhisper | 64 / 12 | 0.0134 | 0.0051 | -0.0083 | (-0.0296 to +0.0130) | 0.418 | 0.695 |
| Google | 64 / 12 | 0.0134 | -0.0051 | -0.0185 | (-0.0358 to -0.0013) | 0.036 | 0.289 |
| Meta | 64 / 12 | 0.0134 | 0.0429 | +0.0295 | (-0.0086 to +0.0676) | 0.123 | 0.392 |
| Microsoft | 64 / 12 | 0.0134 | -0.0262 | -0.0396 | (-0.0920 to +0.0127) | 0.133 | 0.392 |
| Nemo | 64 / 12 | 0.0134 | 0.0187 | +0.0053 | (-0.0132 to +0.0238) | 0.551 | 0.766 |
| Whisper | 64 / 12 | 0.0134 | 0.0163 | +0.0028 | (-0.0146 to +0.0202) | 0.742 | 0.898 |

| **Pronoun ratio** | **n (Dem / Con)** | **Human effect** | **ASR effect** | **Deviation (ASR - Human)** | **95% CI** | **p-value** | **p-FDR** |
| --- | --- | --- | --- | --- | --- | --- | --- |
| **Human (reference)** | **64 / 12** | **-0.0027** | **-** | **-** | **-** | **-** | **-** |
| AWS | 64 / 12 | -0.0027 | 0.0029 | +0.0056 | (-0.0015 to +0.0127) | 0.114 | 0.392 |
| AssemblyAI | 64 / 12 | -0.0027 | -0.0038 | -0.0011 | (-0.0097 to +0.0075) | 0.802 | 0.898 |
| CrisperWhisper | 64 / 12 | -0.0027 | -0.0028 | -0.0000 | (-0.0084 to +0.0083) | 0.991 | 0.991 |
| Google | 64 / 12 | -0.0027 | 0.0039 | +0.0066 | (-0.0014 to +0.0147) | 0.104 | 0.392 |
| Meta | 64 / 12 | -0.0027 | -0.0111 | -0.0084 | (-0.0201 to +0.0033) | 0.147 | 0.392 |
| Microsoft | 64 / 12 | -0.0027 | -0.0091 | -0.0064 | (-0.0173 to +0.0045) | 0.244 | 0.459 |
| Nemo | 64 / 12 | -0.0027 | -0.0026 | +0.0002 | (-0.0072 to +0.0075) | 0.964 | 0.991 |
| Whisper | 64 / 12 | -0.0027 | -0.0009 | +0.0018 | (-0.0076 to +0.0112) | 0.689 | 0.898 |

| **Content-word ratio** | **n (Dem / Con)** | **Human effect** | **ASR effect** | **Deviation (ASR - Human)** | **95% CI** | **p-value** | **p-FDR** |
| --- | --- | --- | --- | --- | --- | --- | --- |
| **Human (reference)** | **64 / 12** | **0.0100** | **-** | **-** | **-** | **-** | **-** |
| AWS | 64 / 12 | 0.0100 | 0.0053 | -0.0047 | (-0.0110 to +0.0016) | 0.138 | 0.392 |
| AssemblyAI | 64 / 12 | 0.0100 | 0.0096 | -0.0004 | (-0.0078 to +0.0070) | 0.910 | 0.970 |
| CrisperWhisper | 64 / 12 | 0.0100 | 0.0055 | -0.0045 | (-0.0119 to +0.0028) | 0.214 | 0.459 |
| Google | 64 / 12 | 0.0100 | -0.0012 | -0.0112 | (-0.0224 to -0.0001) | 0.048 | 0.294 |
| Meta | 64 / 12 | 0.0100 | 0.0218 | +0.0118 | (-0.0003 to +0.0239) | 0.055 | 0.294 |
| Microsoft | 64 / 12 | 0.0100 | -0.0264 | -0.0365 | (-0.0692 to -0.0037) | 0.029 | 0.289 |
| Nemo | 64 / 12 | 0.0100 | 0.0015 | -0.0085 | (-0.0217 to +0.0047) | 0.194 | 0.459 |
| Whisper | 64 / 12 | 0.0100 | 0.0067 | -0.0033 | (-0.0129 to +0.0062) | 0.477 | 0.695 |

| **Mean word length** | **n (Dem / Con)** | **Human effect** | **ASR effect** | **Deviation (ASR - Human)** | **95% CI** | **p-value** | **p-FDR** |
| --- | --- | --- | --- | --- | --- | --- | --- |
| **Human (reference)** | **64 / 12** | **-0.0524** | **-** | **-** | **-** | **-** | **-** |
| AWS | 64 / 12 | -0.0524 | -0.0274 | +0.0250 | (-0.0404 to +0.0904) | 0.441 | 0.695 |
| AssemblyAI | 64 / 12 | -0.0524 | 0.0331 | +0.0855 | (+0.0268 to +0.1442) | 0.005 | 0.176 |
| CrisperWhisper | 64 / 12 | -0.0524 | -0.0450 | +0.0074 | (-0.0551 to +0.0700) | 0.808 | 0.898 |
| Google | 64 / 12 | -0.0524 | -0.0964 | -0.0440 | (-0.1198 to +0.0318) | 0.240 | 0.459 |
| Meta | 64 / 12 | -0.0524 | -0.0034 | +0.0490 | (-0.0370 to +0.1351) | 0.258 | 0.459 |
| Microsoft | 64 / 12 | -0.0524 | -0.0702 | -0.0178 | (-0.1329 to +0.0973) | 0.758 | 0.898 |
| Nemo | 64 / 12 | -0.0524 | -0.0159 | +0.0365 | (-0.0269 to +0.0999) | 0.251 | 0.459 |
| Whisper | 64 / 12 | -0.0524 | 0.0247 | +0.0772 | (+0.0105 to +0.1439) | 0.024 | 0.289 |
